# Supplementary material
Source: Springer Nature journal article supplement (https://www.springermedizin.de/resource/supplementary/12958_2012_1033_MOESM2_ESM.pdf/9566628)

# Gene Expression

Normal Fold Expression

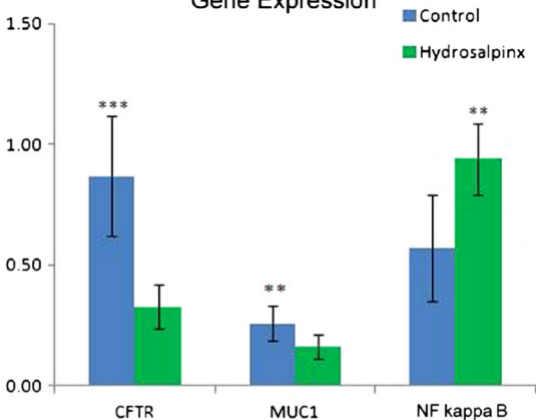

\*\*P<0.01, \*\*\*P<0.001

Supplement: MOESM2 [file 9566628]
